# Supplementary material
Source: publisher figshare collection journal article supplement (https://springernature.figshare.com/ndownloader/files/24181862)
Supplement: Supplementary file 1 [file 24181862]

### Additional file 3

#### **Influence of the polar light cycle on seasonal dynamics of an Antarctic lake microbial community.**

Pratibha Panwar, Michelle A. Allen, Timothy J. Williams, Alyce M. Hancock, Sarah Brazendale, James Bevington, Simon Roux, David Paez-Espino, Stephen Nayfach, Maureen Berg, Frederik Schulz, Amy Chen, Marcel Huntemann, Nicole Shapiro, Nikos Kyrpides, Tanja Woyke, Emiley A. Eloë-Fadrosch and Ricardo Cavicchioli

#### **Additional file 3: Ace Lake video**

##### **Supplementary Video**

The video was taken from the main sampling hole on Ace Lake Nov 23, 2013, using a Contour +2 video camera (1920 x 1080, 30 frames sec<sup>-1</sup>) illuminated using a Fantasea Radiant Video light mounted in a custom housing (Fig. S1). The duration and quality of the original video was edited in order to obtain a file size < 20 Mb.

- 0-9 sec: Inside the mobile work shelter with expeditioners Sarah Payne, Alyce Hancock and Rick Cavicchioli (camera operator).
- 9-18 sec: Descending into and down the Ace Lake ice hole.
- 19+ sec: Numerous *Paralabidocera antarctica* copepods are visible from within the ice hole down the water column (~12 m) to the interface.
- 26+ sec: The colour of the image changes from clear blue (upper zone waters) to green-brown as the camera approaches the interface.
- 30-42 sec: Relatively regularly spaced white spots become visible forming a dot pattern on the surface of the interface, which increase in size as the camera descends.
- 43-56 sec: After the camera enters the interface the image loses clarity and the colour becomes green-brown or vivid green caused by the dense (> 10<sup>8</sup> cells ml<sup>-1</sup>), thick (~1 m) layer of green sulfur bacteria (GSB; *Chlorobium*).
- 57-1:06 sec: As the camera re-emerges from the interface the dotted surface pattern is somewhat visible towards the left hand side of the image.
- 67-1:10 sec: A white plume results from the camera being brought towards the lake surface. The copepods appear more active (than during the descent), possibly as a result of the copepods feeding on the GSB which have been brought up as source of food, the presence of the light re-emerging, and/or the physical disturbance created by the camera.
- 1:11-1:14: Camera withdrawn from the ice hole.
- Note: Approximately eight hours after taking the video, the surface layer of the interface appeared to have reformed.

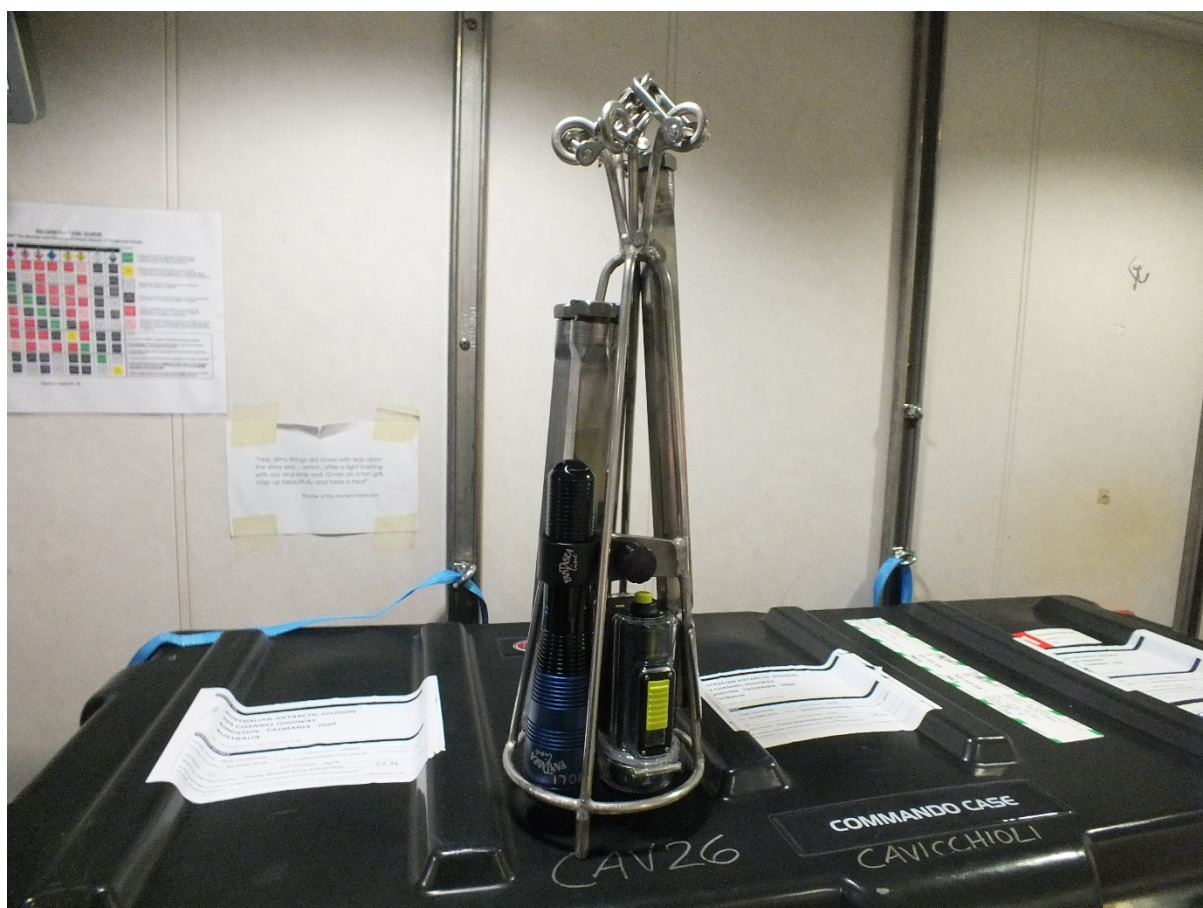

**Fig. S1** Video camera and light mounted in housing.
